# Supplementary material for: Characterization and comparison of post-natal rat Achilles tendon-derived stem cells at different development stages
Source: PubMed Central journal article supplement (PMC4789738; doi:10.1038/srep22946), 2016-03-14
Supplement: srep22946-s1.pdf [file srep22946-s1.pdf]

# Characterization and comparison of post-natal rat Achilles tendon-derived stem cells at different development stages

Jialin Chen, Wei Zhang, Zeyu Liu, Ting Zhu, Weiliang Shen, Jisheng Ran, Qiaomei Tang, Xiaonan Gong, Ludvig J. Backman, Xiao Chen, Xiaowen Chen, Feiqiu Wen, Hongwei Ouyang

**Supplemental table S1.** Differentially regulated gene numbers between every two TSPCs.

| Number of genes          | TSPCs-7d vs. 1d | TSPCs-7d vs. 56d | TSPCs-56d vs. 1d |
|--------------------------|-----------------|------------------|------------------|
| Up regulated             | 359(63%)        | 439(58%)         | 376(46%)         |
| Down regulated           | 215(37%)        | 319(42%)         | 446(54%)         |
| Differentially regulated | 574             | 758              | 822              |

**Supplemental table S2.** Genes screened from top seven biological process GO terms and top two pathway GO terms.

| <b>ProbeSetID</b> | <b>Gene symbol</b> | <b>Gene name</b>                                           | <b>Fold change<br/>TSPCs-7d vs.1d</b> | <b>Fold change<br/>TSPCs-7d vs.56d</b> |
|-------------------|--------------------|------------------------------------------------------------|---------------------------------------|----------------------------------------|
| 1368260_at        | <i>Aurkb</i>       | aurora kinase B                                            | 2.69                                  | 2.73                                   |
| 1368799_at        | <i>Birc5</i>       | baculoviralIAP repeat-containing 5                         | 2.12                                  | 2.65                                   |
| 1379582_a_at      | <i>Ccna2</i>       | cyclin A2                                                  | 2.90                                  | 3.52                                   |
| 1370345_at        | <i>Ccnb1</i>       | cyclin B1                                                  | 2.64                                  | 2.70                                   |
| 1370346_at        |                    |                                                            | 3.30                                  | 2.78                                   |
| 1389566_at        | <i>Ccnb2</i>       | cyclin B2                                                  | 2.79                                  | 3.18                                   |
| 1367776_at        | <i>Cdc2</i>        | cell division cycle 2, G1 to S and G2 to M                 | 2.26                                  | 2.38                                   |
| 1370294_a_at      | <i>Cdc20</i>       | cell division cycle 20 homolog ( <i>S. cerevisiae</i> )    | 2.61                                  | 2.79                                   |
| 1389506_x_at      |                    |                                                            | 2.13                                  | 2.83                                   |
| 1379234_a_at      | <i>Cdc45l</i>      | CDC45 cell division cycle 45-like ( <i>S. cerevisiae</i> ) | 2.72                                  | 2.00                                   |

|            |                  |                                                                                               |      |      |
|------------|------------------|-----------------------------------------------------------------------------------------------|------|------|
| 1374449_at | <i>Cdca3</i>     | cell division cycle associated 3                                                              | 2.96 | 2.28 |
| 1371928_at | <i>Cdca8</i>     | cell division cycle associated 8                                                              | 2.22 | 2.58 |
| 1389542_at | <i>Cenpe</i>     | centromere protein E                                                                          | 2.80 | 3.18 |
| 1373823_at | <i>Cks2</i>      | CDC28 protein kinase regulatory subunit 2                                                     | 2.33 | 2.36 |
| 1397704_at | <i>Esco2</i>     | establishment of cohesion 1 homolog 2 ( <i>S. cerevisiae</i> )                                | 3.31 | 2.64 |
|            | <i>LOC685024</i> | similar to N-acetyltransferase ESCO2 (Establishment of cohesion 1 homolog 2) (ECO1 homolog 2) |      |      |
|            | <i>LOC691979</i> | similar to N-acetyltransferase ESCO2 (Establishment of cohesion 1 homolog 2) (ECO1 homolog 2) |      |      |
| 1385733_at | <i>Exo1</i>      | exonuclease 1                                                                                 | 2.80 | 2.39 |
| 1378240_at | <i>Fancd2</i>    | Fanconianemia, complementation group D2                                                       | 2.83 | 2.71 |
| 1389103_at | <i>Gins4</i>     | GINS complex subunit 4 (Sld5 homolog)                                                         | 2.17 | 2.08 |
| 1390891_at | <i>Kif11</i>     | kinesin family member 11                                                                      | 2.81 | 2.96 |

|              |                   |                                                                             |      |      |
|--------------|-------------------|-----------------------------------------------------------------------------|------|------|
| 1374794_at   | <i>Kif15</i>      | kinesin family member 15                                                    | 2.69 | 3.30 |
| 1372903_at   | <i>Kif18b</i>     | kinesin family member 18B                                                   | 2.42 | 2.97 |
| 1373722_at   | <i>Kif20a</i>     | kinesin family member 20A                                                   | 2.36 | 2.89 |
| 1380775_at   | <i>Kif20b</i>     | kinesin family member 20B                                                   | 2.72 | 3.62 |
| 1372516_at   | <i>Kif22</i>      | kinesin family member 22                                                    | 2.50 | 2.36 |
| 1391063_at   | <i>Kif23</i>      | kinesin family member 23                                                    | 2.47 | 2.63 |
| 1374912_at   | <i>Kif2c</i>      | kinesin family member 2C                                                    | 2.75 | 2.41 |
| 1379479_at   | <i>Kif4</i>       | kinesin family member 4                                                     | 3.51 | 2.97 |
| 1376185_at   | <i>Kifc1</i>      | kinesin family member C1                                                    | 2.88 | 2.56 |
| 1368204_at   | <i>Lig1</i>       | ligase I, DNA, ATP-dependent                                                | 2.44 | 2.34 |
| 1379195_s_at |                   |                                                                             | 2.18 | 2.12 |
| 1376346_at   | <i>LOC681162</i>  | similar to Cyclin-dependent kinases regulatory subunit 1 (CKS-1) (Sid 1334) | 0.32 | 0.34 |
|              | <i>RGD1561797</i> | RGD1561797                                                                  |      |      |

|              |               |                                                                             |      |      |
|--------------|---------------|-----------------------------------------------------------------------------|------|------|
| 1376951_at   | <i>Mad211</i> | MAD2 (mitotic arrest deficient, homolog)-like 1 (yeast)                     | 2.79 | 2.88 |
| 1378028_at   |               |                                                                             | 2.54 | 2.56 |
| 1398602_at   |               |                                                                             | 2.73 | 2.58 |
| 1376055_at   | <i>Mcm5</i>   | minichromosome maintenance complex component 5                              | 3.02 | 2.36 |
| 1371074_a_at | <i>Mcm6</i>   | minichromosome maintenance complex component 6                              | 3.35 | 2.12 |
| 1388744_at   | <i>Mcm7</i>   | minichromosome maintenance deficient 7 ( <i>S. cerevisiae</i> )             | 3.07 | 2.39 |
| 1381130_at   | <i>Mcm8</i>   | minichromosome maintenance complex component 8                              | 2.92 | 2.60 |
| 1377299_at   | <i>Nasp</i>   | nuclearautoantigenic sperm protein (histone-binding)                        | 2.46 | 2.66 |
| 1378264_at   |               |                                                                             | 2.02 | 2.30 |
| 1374799_at   | <i>Ncapd2</i> | non-SMC condensin I complex, subunit D2                                     | 2.58 | 3.28 |
| 1378296_at   | <i>Ncaph</i>  | non-SMC condensin I complex, subunit H                                      | 3.14 | 2.89 |
| 1383940_at   | <i>Nuf2</i>   | NUF2, NDC80 kinetochore complex component, homolog ( <i>S. cerevisiae</i> ) | 2.66 | 2.79 |
| 1385522_at   | <i>Orc11</i>  | origin recognition complex, subunit 1-like (yeast)                          | 3.25 | 2.26 |

|            |                   |                                                                     |      |      |
|------------|-------------------|---------------------------------------------------------------------|------|------|
| 1370297_at | <i>Plk1</i>       | polo-like kinase 1 (Drosophila)                                     | 2.66 | 2.57 |
| 1376611_at | <i>Pola1</i>      | polymerase (DNA directed), alpha 1                                  | 2.38 | 2.38 |
| 1389421_at | <i>Pole</i>       | polymerase (DNA directed), epsilon                                  | 2.06 | 2.66 |
| 1383578_at | <i>Rad51</i>      | RAD51 homolog (RecA homolog, E. coli) (S. cerevisiae)               | 3.39 | 2.64 |
| 1389326_at | <i>Rfc3</i>       | replication factor C (activator 1) 3                                | 2.09 | 2.17 |
| 1388458_at | <i>Rfc4</i>       | replication factor C (activator 1) 4                                | 2.12 | 2.44 |
| 1395944_at | <i>RGD1310778</i> | similar to Putative protein C21orf45                                | 2.50 | 2.60 |
| 1368144_at | <i>Rgs2</i>       | regulator of G-protein signaling 2                                  | 0.40 | 2.15 |
| 1393848_at | <i>Rrm2</i>       | ribonucleotidereductase M2                                          | 3.03 | 2.47 |
| 1389668_at | <i>Spc25</i>      | SPC25, NDC80 kinetochore complex component, homolog (S. cerevisiae) | 3.05 | 2.70 |
| 1368522_at | <i>Timeless</i>   | timeless homolog (Drosophila)                                       | 2.41 | 2.33 |
| 1372631_at | <i>Tk1</i>        | thymidine kinase 1, soluble                                         | 2.93 | 2.30 |
| 1378640_at | <i>Uhrf1</i>      | ubiquitin-like with PHD and ring finger domains 1                   | 3.49 | 2.78 |

|            |             |                                |      |      |
|------------|-------------|--------------------------------|------|------|
| 1373538_at | <i>Usp1</i> | ubiquitin specific peptidase 1 | 2.86 | 2.81 |
| 1376687_at |             |                                | 2.93 | 2.39 |
